# Supplementary material
Source: MDPI journal article supplement (https://www.mdpi.com/2077-0375/12/11/1087)
Supplement: s1 [file s1]

Archive with 1 entries (1 files):
- membranes-1966665-SM.pdf
